# Supplementary material for: Harnessing thiazole chemistry for antifungal strategies through an experimental and computational chemistry approach: anti-biofilm, molecular docking, dynamics, and DFT analysis
Source: Royal Society of Chemistry journal article supplement (doi:10.1039/d5ra00657k), 2025-01-01
Supplement: d5ra00657k1.pdf [file d5ra00657k1.pdf]

## Supporting Information

### **"Harnessing Thiazole Chemistry for Antifungal Strategies through Experimental and Computational Chemistry Approach: Anti-Biofilm, Molecular Docking, Dynamics, and DFT Analysis"**

Rahul A. Shinde<sup>1\*</sup>, Vishnu A. Adole<sup>2\*</sup>, Rajendra H. Patil<sup>3</sup>, Bhushan B. Khairnar<sup>4</sup>, Bapu S. Jagdale<sup>2\*</sup>, Tahani Mazyad Almutairi<sup>5</sup>, Harun Patel<sup>6</sup>, Mohammad Shahidul Islam<sup>5\*</sup>, Iqar Ahmad<sup>6</sup>, A. Ram Kumar<sup>7</sup>, S. Selvaraj<sup>8</sup>, Thansing B. Pawar<sup>2</sup>, Mahboob Alam<sup>9</sup>

<sup>1</sup>Department of Chemistry, Mahatma Gandhi Vidyamandir's Maharaja Sayajirao Gaikwad Arts, Science and Commerce College, Malegaon, Nashik 423105, India

<sup>2</sup>Department of Chemistry, Mahatma Gandhi Vidyamandir's Loknete Vyankatrao Hiray Arts, Science and Commerce College, Panchavati, Nashik 422003, India

<sup>3</sup>Department of Biotechnology, Savitribai Phule Pune University, Pune 411007, India

<sup>4</sup>Interdisciplinary School of Science, Savitribai Phule Pune University, Pune 411007, India

<sup>5</sup>Department of Chemistry, College of Science, King Saud University, P.O. Box 2455, Riyadh 11451, Saudi Arabia

<sup>6</sup>Department of Pharmaceutical Chemistry, R. C. Patel Institute of Pharmaceutical Education and Research, Shirpur, Dhule 425405, Maharashtra, India

<sup>7</sup>Department of Biotechnology, Saveetha School of Engineering, Saveetha Institute of Medical and Technical Sciences (SIMATS), Saveetha University, Thandalam, Chennai, 602105, Tamil Nadu, India.

<sup>8</sup>Department of Physics, Saveetha School of Engineering, Saveetha Institute of Medical and Technical Sciences (SIMATS), Saveetha University, Thandalam, Chennai, 602105, Tamil Nadu, India.

<sup>9</sup>Division of Chemistry and Biotechnology, Dongguk University, 123, Dongdaero, Gyeongju 780714, Republic of South Korea.

1. (*E*)-2-(2-(1-(5-chlorothiophen-2-yl)ethylidene)hydrazineyl)-4-(4-nitrophenyl)thiazole (4a):

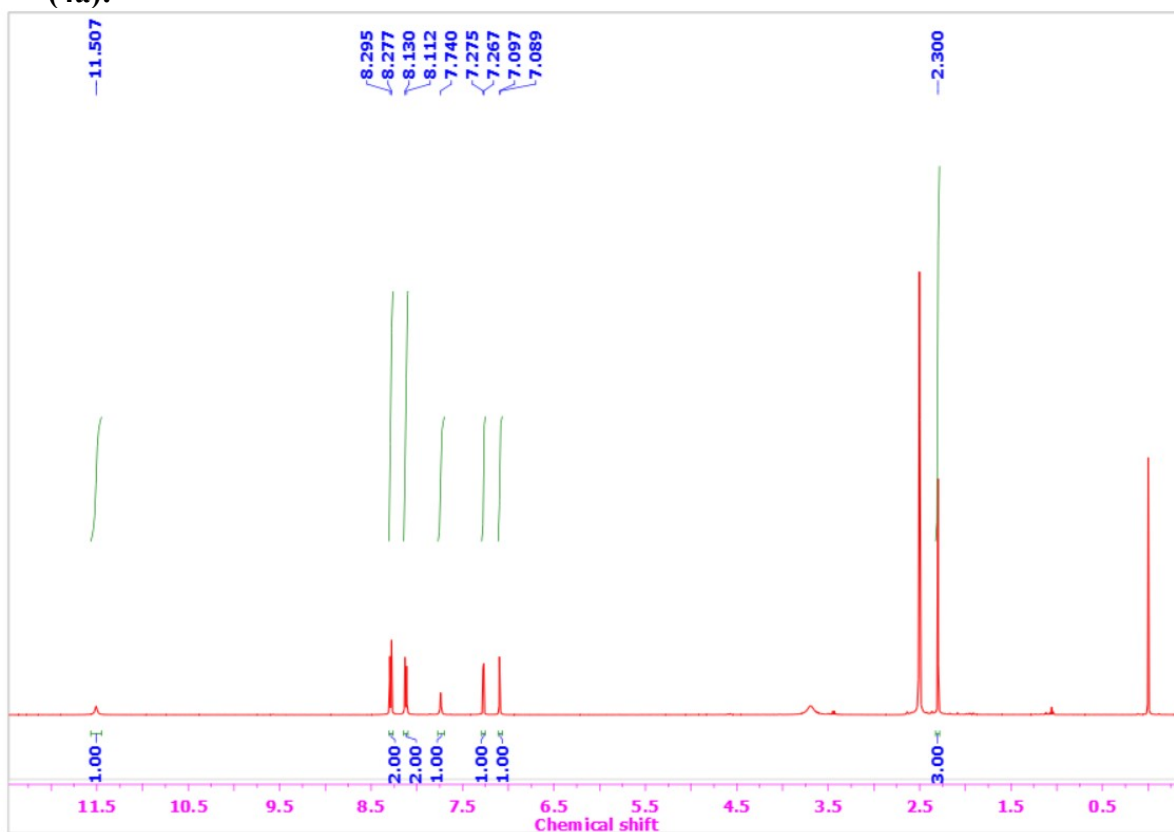

<sup>1</sup>H NMR spectrum of 4a

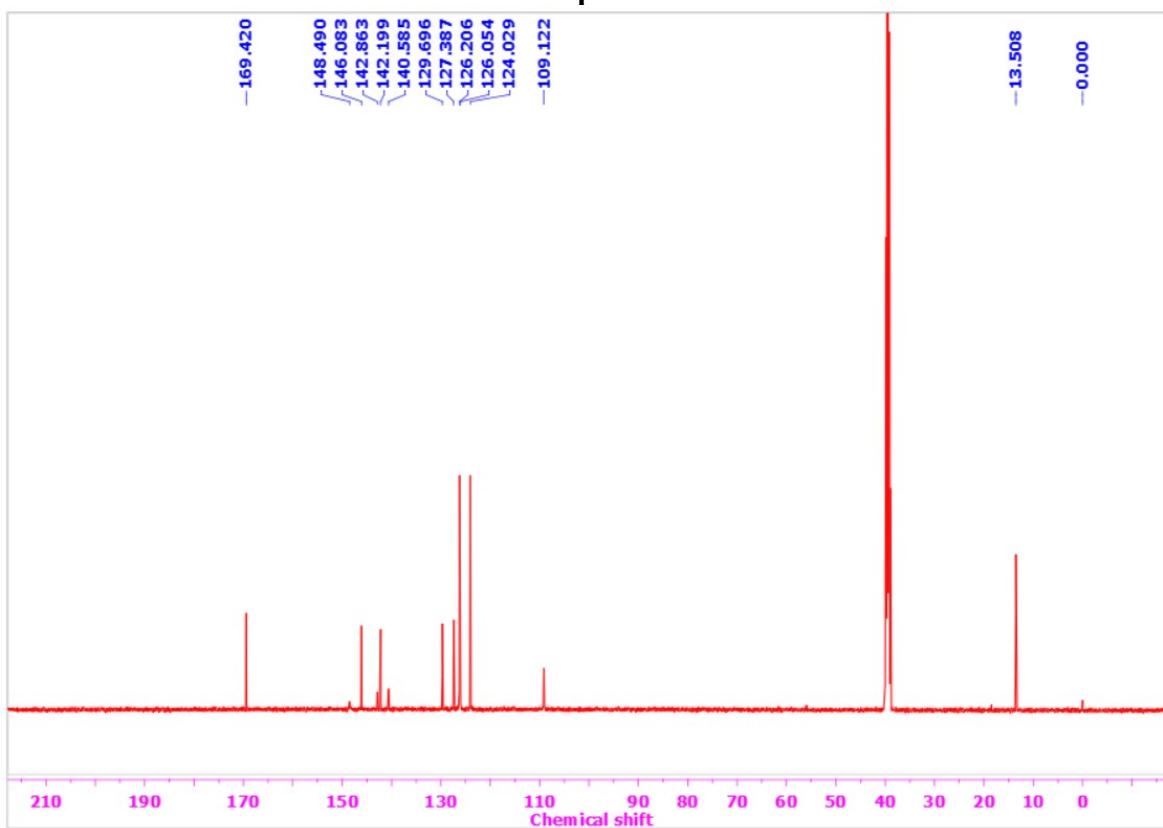

<sup>13</sup>C NMR spectrum of 4a

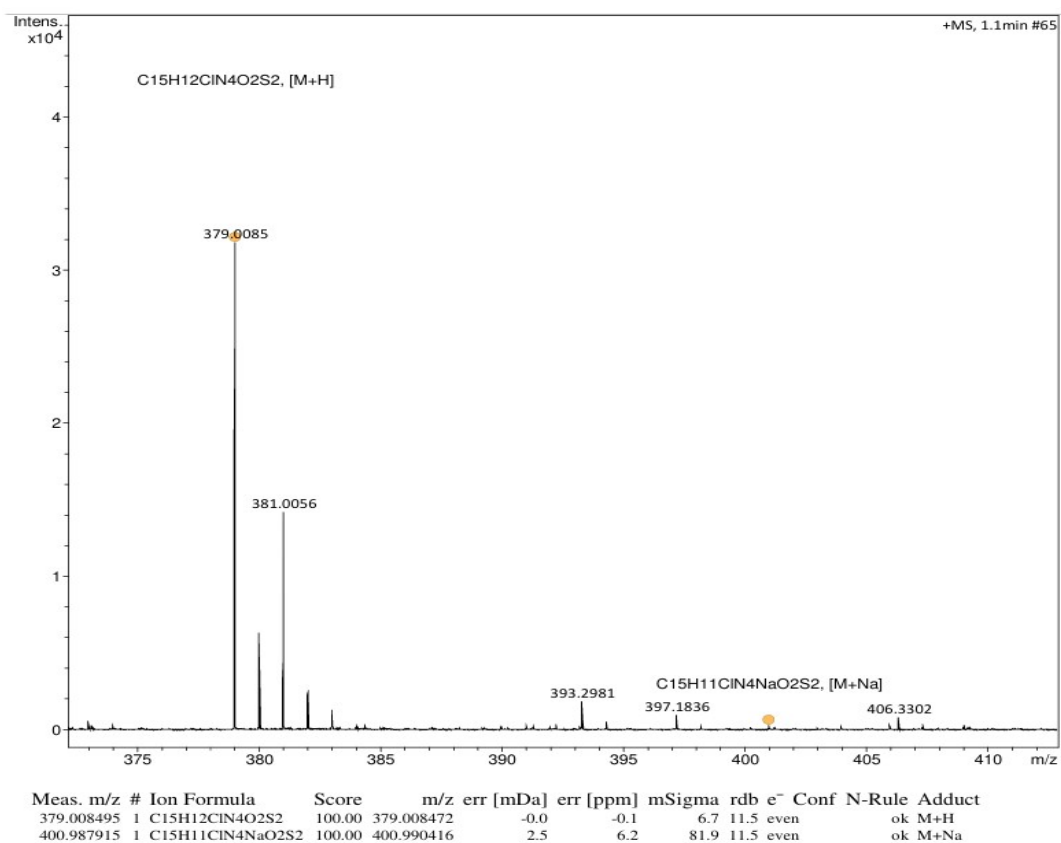

### HRMS of 4a

**(E)-4-(4-chlorophenyl)-2-(2-(1-(5-chlorothiophen-2-yl)ethylidene)hydrazineyl)thiazole (4b):**

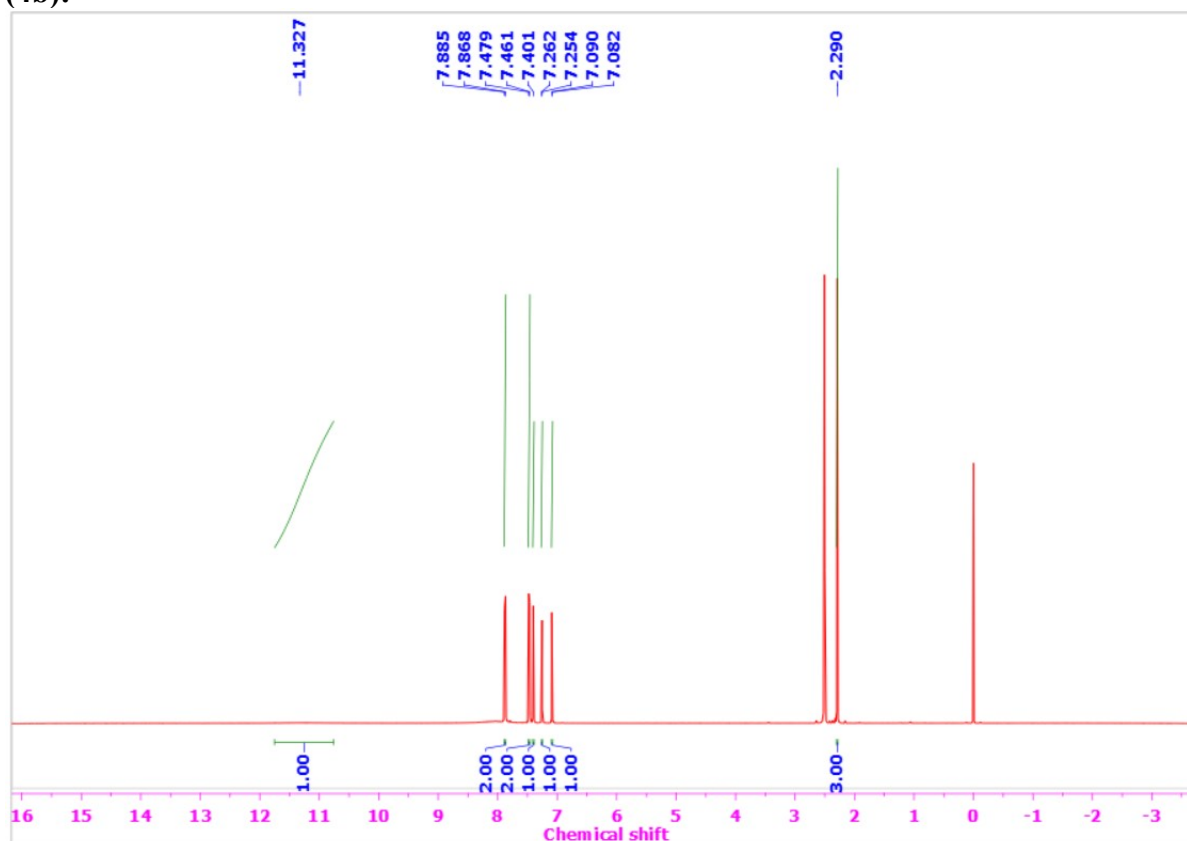

<sup>1</sup>H NMR spectrum of 4b

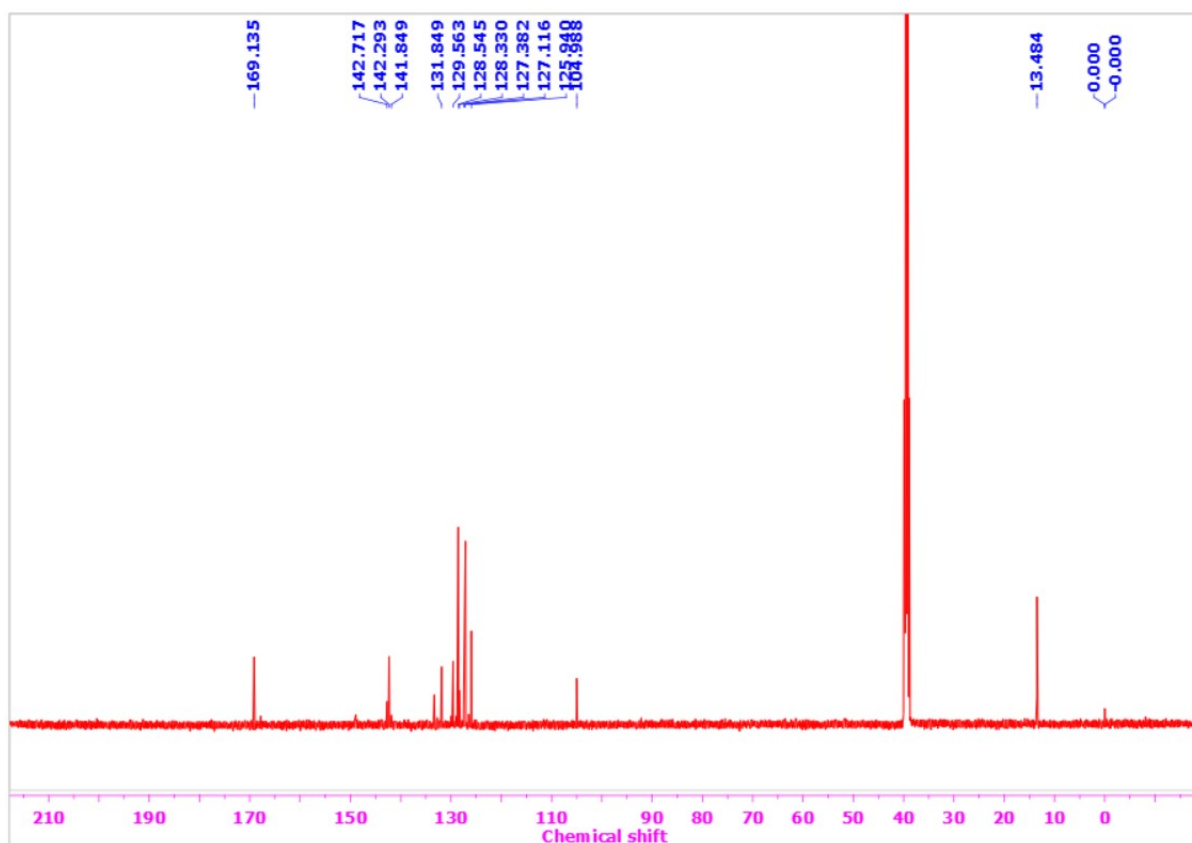

<sup>13</sup>C NMR spectrum of 4b

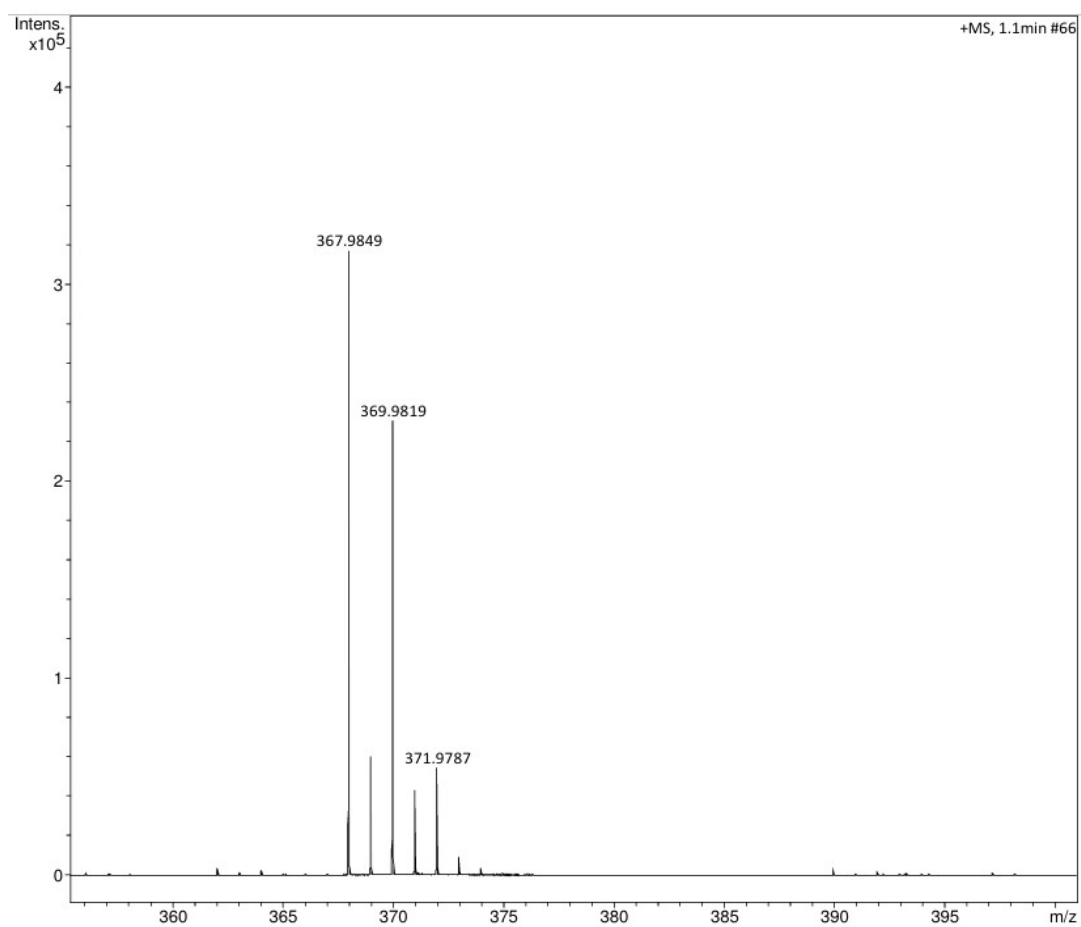

HRMS of 4b

**(*E*)-4-(4-bromophenyl)-2-(2-(1-(5-chlorothiophen-2-yl)ethylidene)hydrazineyl)thiazole (4c):**

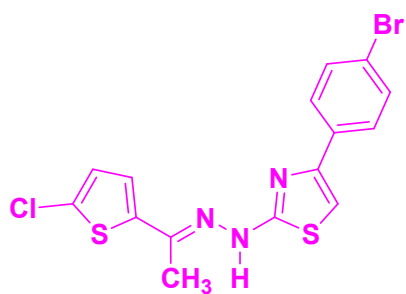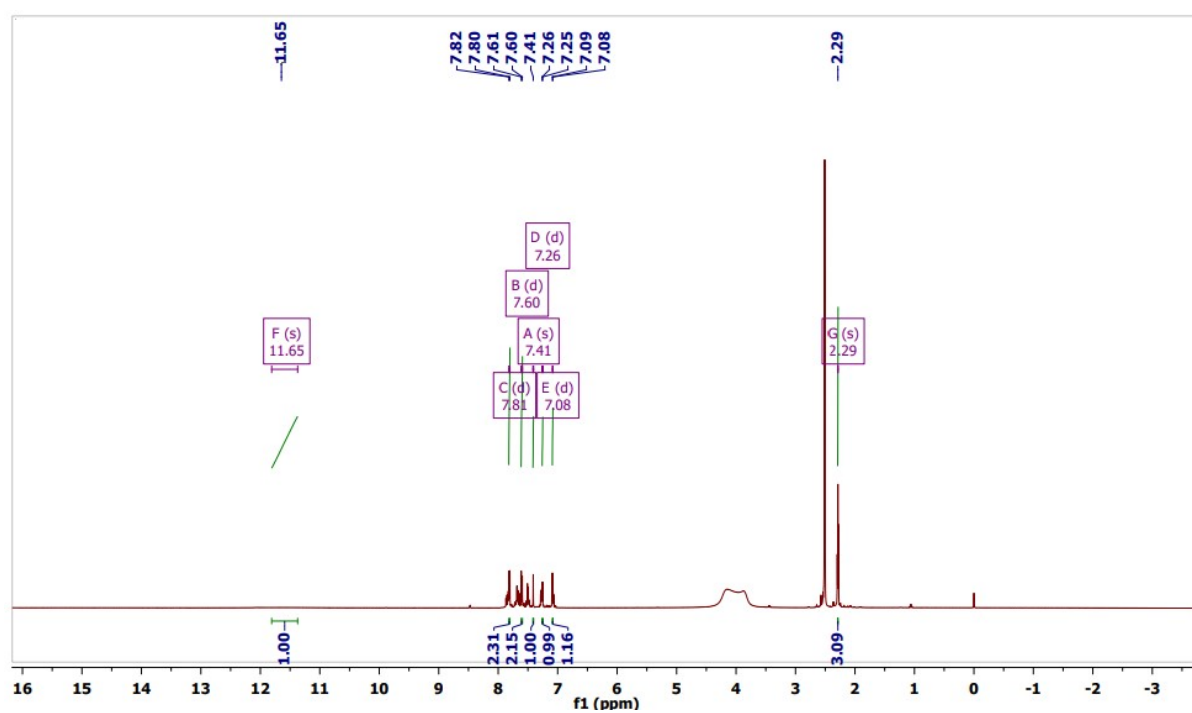

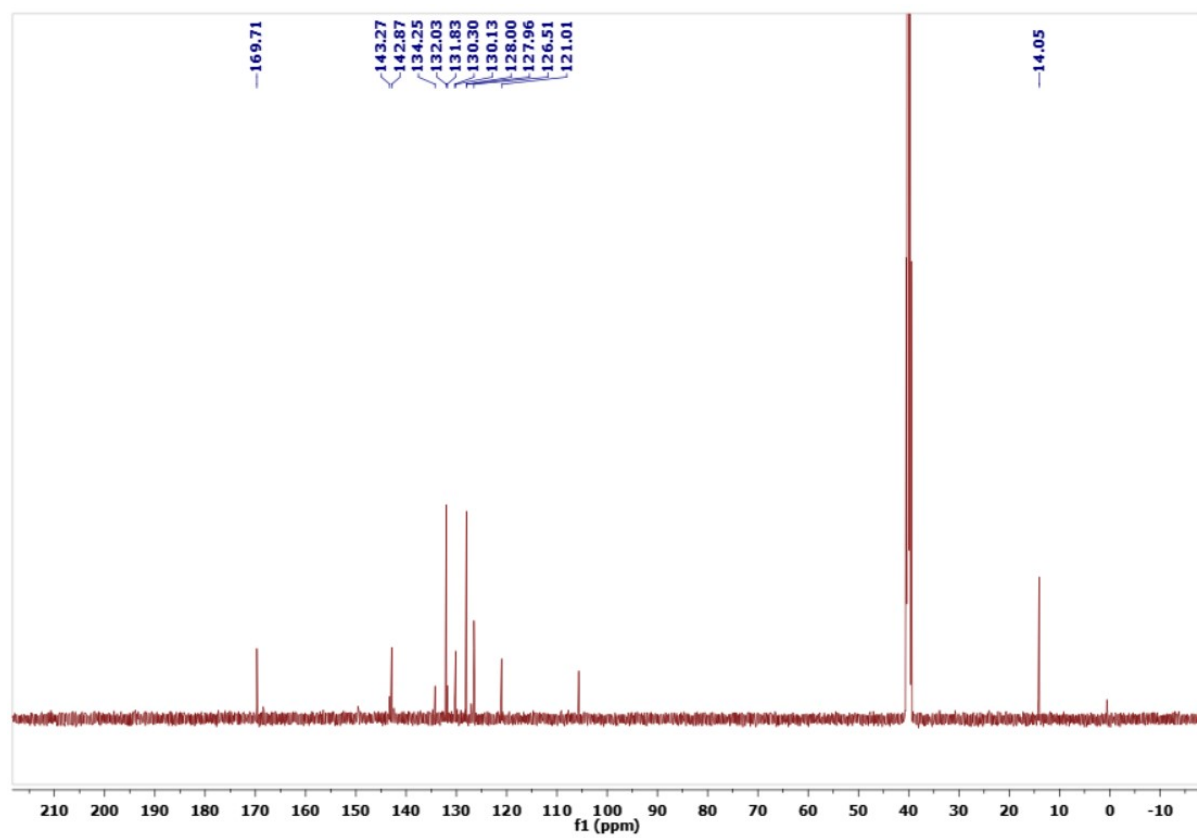

$^{13}\text{C}$  NMR spectrum of 4c

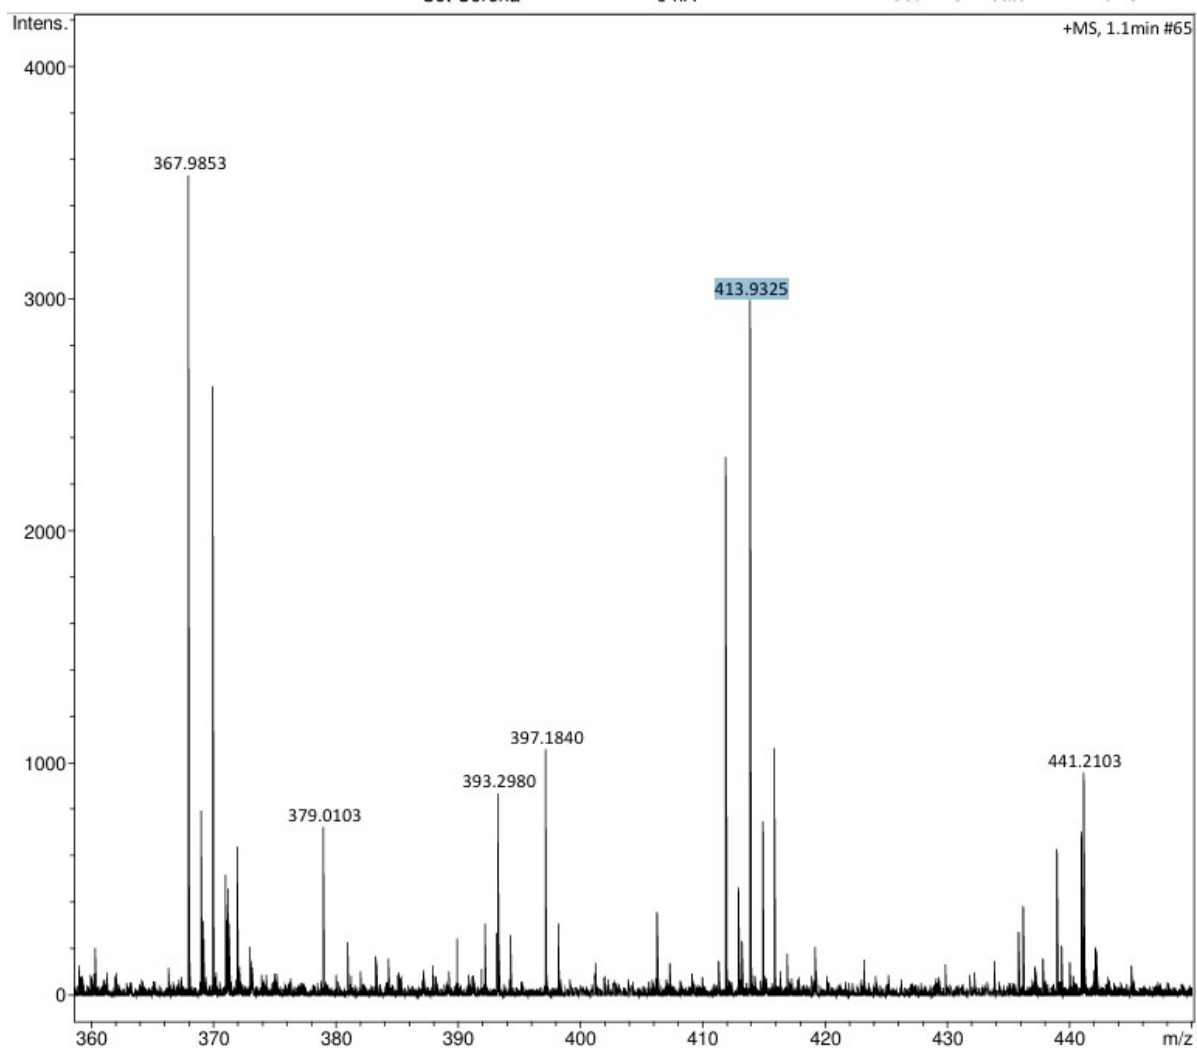

**HRMS of compound 4c**

**(*E*)-2-(2-(1-(5-chlorothiophen-2-yl)ethylidene)hydrazineyl)-4-phenylthiazole (4d):**

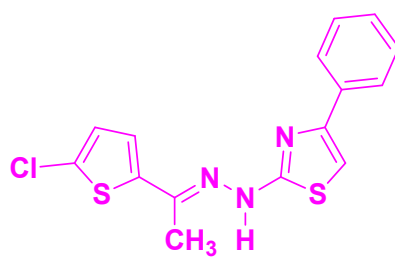

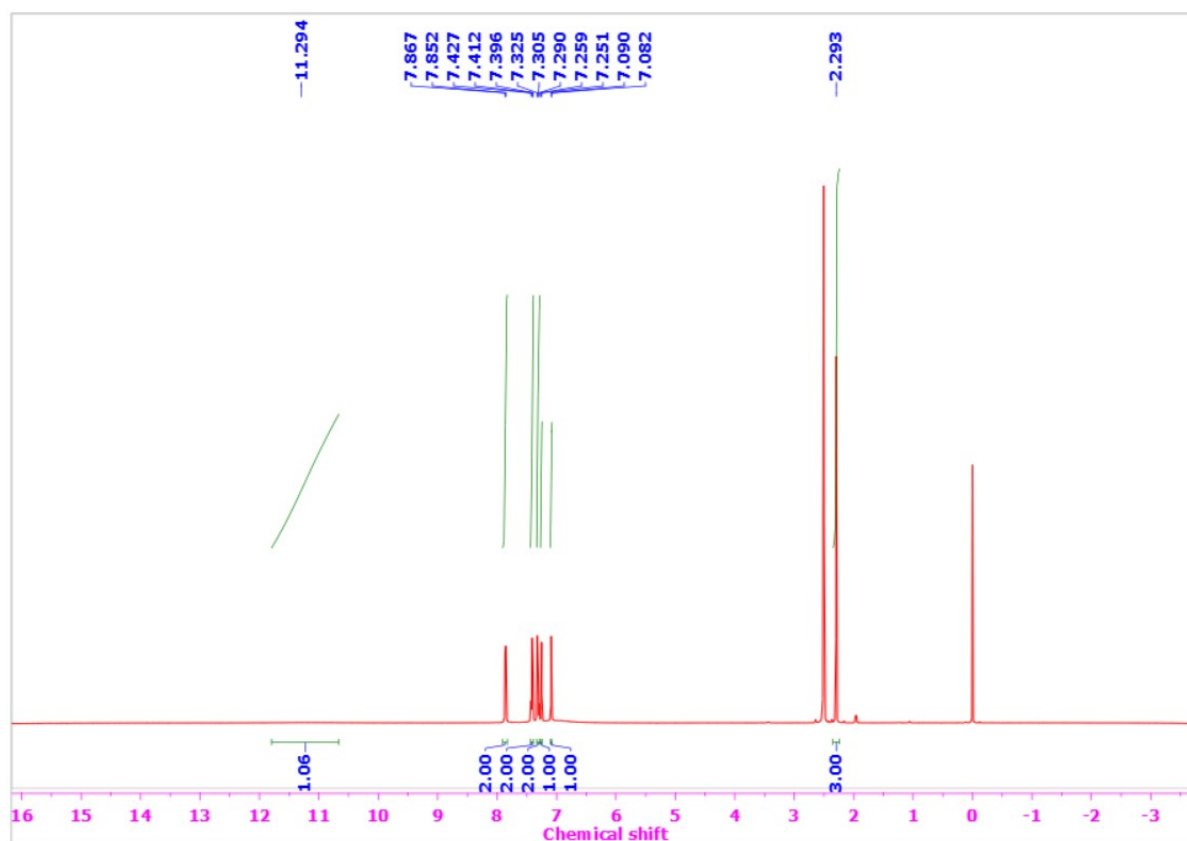

**<sup>1</sup>H NMR spectrum of 4d**

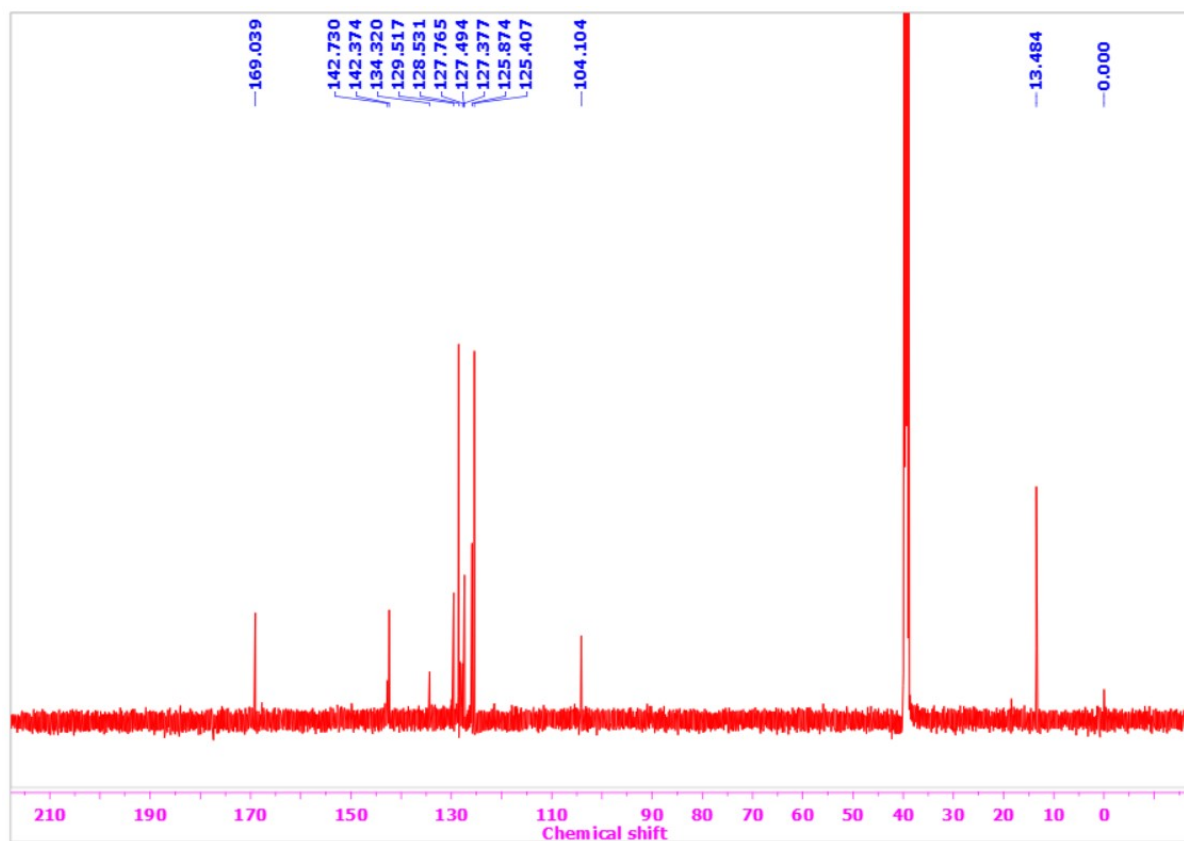

**<sup>13</sup>C NMR spectrum of 4d**



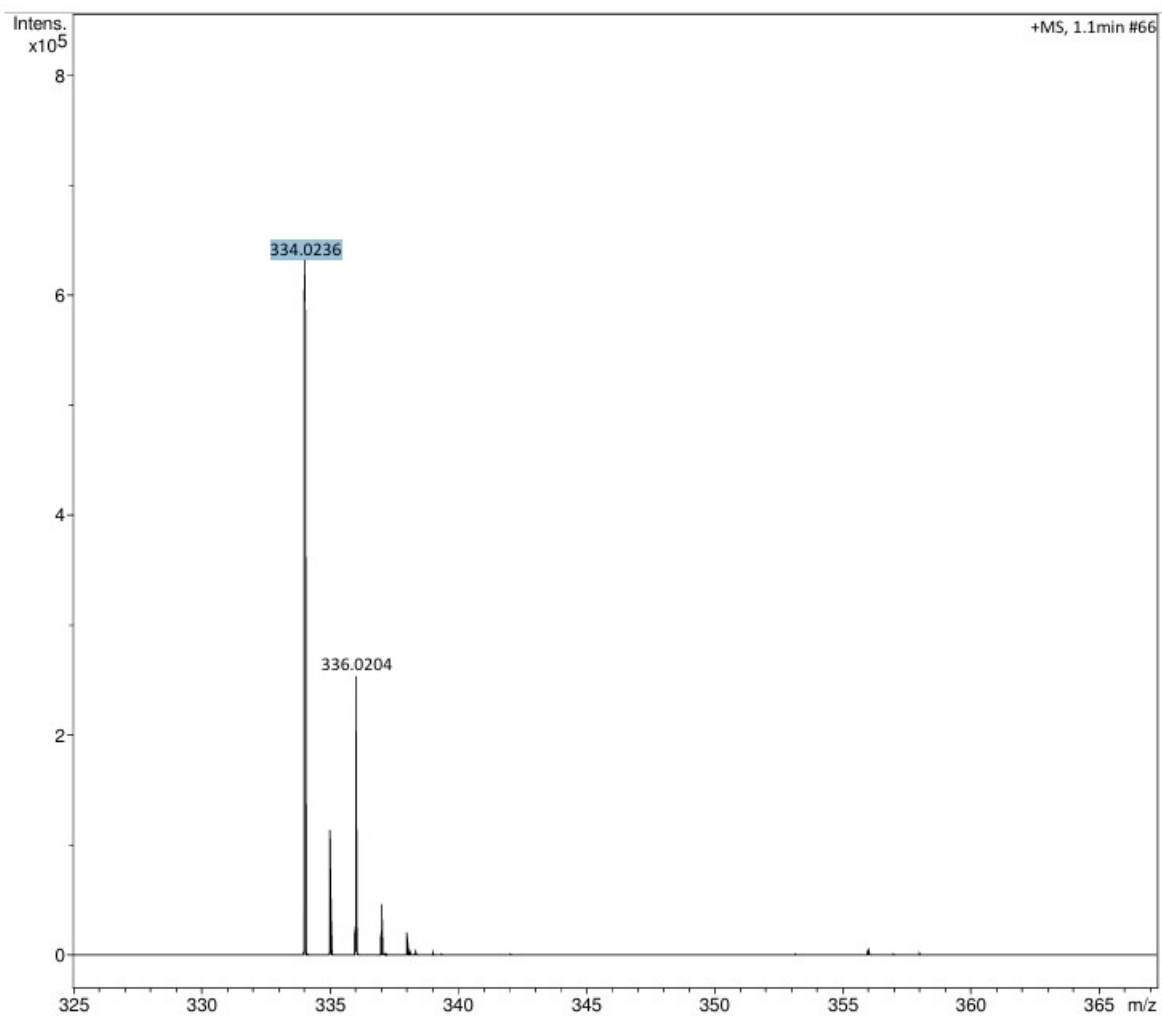

**HRMS of 4d**
